# Supplementary material
Source: HighWire-hosted journal article supplement (https://svn.smart01.highwire.org/content/10/1/104)
Supplement: inline-supplementary-material-1 [file inline-supplementary-material-1.pdf]

**Supplementary table 1. Population and fistula angioarchitecture of pediatric dural arteriovenous fistula**

| Variable                                               | Value      |
|--------------------------------------------------------|------------|
| No. of patients                                        | 43         |
| Male                                                   | 29 (67.3%) |
| Age first symptoms (years, mean ± SD)                  | 8.4 (6.0)  |
| Age first treatment at our hospital (years, mean ± SD) | 10.2 (5.7) |
| Cardiomegaly                                           | 10 (23.3%) |
| Seizures                                               | 7 (16.3%)  |
| Ocular symptoms                                        | 16 (37.2%) |
| Pulsatile head mass/Dilated facial veins               | 9 (20.9%)  |
| Headaches                                              | 10 (23.2%) |
| Focal neurological deficit                             | 7 (16.3%)  |
| Developmental delay                                    | 5 (11.6%)  |
| Hydrocephalus or macrocephaly                          | 5 (11.6%)  |
| Current or prior hemorrhage                            | 7 (16.3%)  |
| Location                                               |            |
| Transverse-sigmoid                                     | 18 (41.9%) |
| Tentorial                                              | 4 (9.3%)   |
| Cavernous sinus                                        | 5 (11.6%)  |
| Convexity/SSS                                          | 11 (25.6%) |
| Anterior cranial fossa                                 | 1 (2.3%)   |
| Torcular (+- SSS or transverse sinus)                  | 7 (16.3%)  |

|                                    |            |
|------------------------------------|------------|
| Middle cranial fossa               | 2 (4.7%)   |
| Other                              | 10 (23.3%) |
| Angioarchitecture                  |            |
| > 1 location of DAVF               | 11 (25.6%) |
| Venous ectasia                     | 28 (65.1%) |
| Venous reflux                      | 32 (74.4%) |
| Venous sinus thrombus/occlusion    | 26 (60.5%) |
| Venous sinus dilation              | 19 (44.2%) |
| Persistent fetal venous structures | 8 (18.6%)  |
| Cognard type                       |            |
| Cognard type I                     | 6 (14.0%)  |
| Cognard type II a                  | 5 (11.6%)  |
| Cognard type II b                  | 9 (20.9%)  |
| Cognard type II a + b              | 15 (34.9%) |
| Cognard type III                   | 4 (9.3%)   |
| Cognard type IV                    | 3 (7.0%)   |
| Cognard type V                     | 1 (2.3%)   |
| Borden type                        |            |
| Borden type I                      | 11 (25.6%) |
| Borden type II                     | 24 (55.8%) |
| Borden type III                    | 8 (18.6%)  |
| Lasjaunias type                    |            |

|                          |            |
|--------------------------|------------|
| Infantile type           | 17 (39.5%) |
| Adult type               | 18 (41.9%) |
| Dural sinus malformation | 8 (18.6%)  |
| Comorbidity              | 11 (25.6%) |

SD, standard deviation; SSS, superior sagittal sinus.
